# Supplementary material
Source: HighWire-hosted journal article supplement (https://erj.ersjournals.com/content/54/4/1900825)
Supplement: inline-supplementary-material-1 [file inline-supplementary-material-1.pdf]

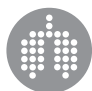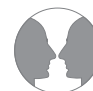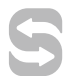

SHAREABLE PDF

# Epstein–Barr virus in pleural effusions: protagonist or pretender?

David T. Arnold<sup>1</sup>, Tim Suri<sup>2</sup>, Fergus Hamilton<sup>3</sup>, Anna Morley<sup>1</sup>, Andrew Medford<sup>1</sup>, Ian B. Vipond<sup>4</sup>, Peter Muir <sup>4</sup> and Nick A. Maskell<sup>1</sup>

**Affiliations:** <sup>1</sup>Academic Respiratory Unit, School of Translational Health Sciences, University of Bristol, Bristol, UK. <sup>2</sup>School of Cellular and Molecular Medicine, University of Bristol, Bristol, UK. <sup>3</sup>Dept of Microbiology, North Bristol NHS Trust, Bristol, UK. <sup>4</sup>Public Health England, South West Regional Laboratory, National Infection Service, Bristol, UK.

**Correspondence:** David T. Arnold, Level 2, Learning and Research Building, Southmead Hospital, Bristol, BS10 5NB, UK. E-mail: [arnold.dta@gmail.com](mailto:arnold.dta@gmail.com)

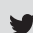

@ERSpublications

Previous studies have suggested an association between Epstein–Barr virus (EBV) and inflammatory pleuritis (IP). The incidence of IP in this 1005-patient cohort was 3%, with no evidence of increased pleural fluid EBV DNA compared to controls. <http://bit.ly/2lVGvNV>

**Cite this article as:** Arnold DT, Suri T, Hamilton F, *et al.* Epstein–Barr virus in pleural effusions: protagonist or pretender?. *Eur Respir J* 2019; 54: 1900825 [<https://doi.org/10.1183/13993003.00825-2019>].

This single-page version can be shared freely online.

## To the Editor:

Unilateral pleural effusions are a common diagnostic challenge for the respiratory physician. In the majority of patients, a diagnosis can be made according to medical history, computed tomography and pleural fluid analysis [1]. A proportion of patients will require a pleural biopsy but, following this, a minority will remain undiagnosed and are defined as having inflammatory pleuritis (IP) [2]. These patients often require extended follow-up to ensure effusion resolution and exclude malignancy.
